# Supplementary material for: Unravelling the reactivity of metastable molybdenum carbide nanoclusters in the C–H bond activation of methane, ethane and ethylene
Source: Royal Society of Chemistry journal article supplement (doi:10.1039/d0nr07044k), 2020-12-12
Supplement: d0nr07044k1.pdf [file d0nr07044k1.pdf]

1 **Unravelling the Reactivity of Metastable Molybdenum Carbide Nanoclusters**  
2 **in C-H Bond Activation of Methane, Ethane and Ethylene**

3

4 Sonit Balyan<sup>a,b</sup>, Shikha Saini<sup>c</sup>, Tuhin S. Khan<sup>d\*</sup>, K. K. Pant<sup>b</sup>, Puneet Gupta<sup>e\*</sup>, Saswata  
5 Bhattacharya<sup>c\*</sup> and M. Ali Haider<sup>a\*</sup>

6 <sup>a</sup> Renewable Energy and Chemicals Lab, Department of Chemical Engineering, Indian Institute  
7 of Technology Delhi, Hauz Khas, New Delhi, India

8 <sup>b</sup> Catalytic Reaction Engineering Lab, Department of Chemical Engineering, Indian Institute of  
9 Technology Delhi, Hauz Khas, New Delhi, India

10 <sup>c</sup> Department of Physics, Indian Institute of Technology Delhi, Hauz Khas, New Delhi, India

11 <sup>d</sup> Light Stock Processing Division, CSIR-Indian Institute of Petroleum, Dehradun, 248005, India

12 <sup>e</sup> Computational Catalysis Center, Department of Chemistry, Indian Institute of Technology  
13 Roorkee, Roorkee, Uttarakhand, India

14 Corresponding authors email addresses: [tuhins.khan@iip.res.in](mailto:tuhins.khan@iip.res.in), [puneet.gupta@cy.iitr.ac.in](mailto:puneet.gupta@cy.iitr.ac.in),  
15 [saswata@physics.iitd.ac.in](mailto:saswata@physics.iitd.ac.in), [haider@iitd.ac.in](mailto:haider@iitd.ac.in)

16

17

18

19

20

21

22

23 **Table S1.** Radial functions as considered for tight setting of basis set for C, and Mo in cGA.

|                |              |                         |
|----------------|--------------|-------------------------|
| <b>Minimal</b> | [He] + 2s 2p | [Kr] + 5s 4p 4d         |
| <b>Tier 1</b>  | H(2p,1.7)    | H(4f,8.4)               |
|                | H(3d,6.0)    | H(3d,2.8)               |
|                | H(2s,4.9)    | I(5p)                   |
|                |              | H(5g,12.0)              |
|                |              | I(5s)                   |
| <b>Tier 2</b>  | H(4f,9.8)    | H(4f,12.4)              |
|                | H(3p,5.2)    | H(3d,3.3)               |
|                | H(3s,4.3)    | H(6h,17.2)              |
|                | H(3d,6.2)    | H(4f,7.6)               |
|                |              | H(3p,3.0)<br>H(1s,0.65) |

24

25 Here, the first line (minimal) represents the free-atom radial functions (noble-gas configuration  
 26 of the core and quantum numbers of the additional valence radial functions). “H(nl,z)” is the  
 27 hydrogen-like basis function for the bare Coulomb potential ( $z/r$ ) that includes its radial and  
 28 angular momentum quantum numbers,  $n$  and  $l$ . I(nl) is a  $n,l$  radial function of a free ion of  
 29 species Mo.

30 **Table S2.** Geometry of Mo<sub>2</sub>C<sub>6</sub>, Nanocluster **1**.

| <b>Bond length, Å</b>                                                             | <b>Bond angle, degree</b> |                                                         | <b>Atom</b> | <b>X</b> | <b>Y</b> | <b>Z</b> |        |
|-----------------------------------------------------------------------------------|---------------------------|---------------------------------------------------------|-------------|----------|----------|----------|--------|
| Mo <sup>(1)</sup> -Mo <sup>(2)</sup>                                              | 2.65                      | C <sup>(1)</sup> -Mo <sup>(1)</sup> -C <sup>(1)</sup>   | 89          | Mo       | -0.0029  | 0.4573   | 0.1725 |
| Mo <sup>(1)</sup> -C <sup>(1)</sup>                                               | 1.88                      | Mo <sup>(1)</sup> -Mo <sup>(2)</sup> -C <sup>(1)</sup>  | 45          | Mo       | 1.7880   | 0.5994   | 2.2251 |
| Mo <sup>(1)</sup> -C <sup>(11)</sup>                                              | 1.94                      | C <sup>(11)</sup> -Mo <sup>(1)</sup> -C <sup>(1)</sup>  | 103         | C        | 1.0825   | 1.8174   | 0.9356 |
| C <sup>(11)</sup> -C <sup>(111)</sup> ,<br>C <sup>(111)</sup> -C <sup>(111)</sup> | 1.31                      | Mo <sup>(1)</sup> -Mo <sup>(2)</sup> -C <sup>(11)</sup> | 99          | C        | 0.7790   | -0.7828  | 1.3819 |
|                                                                                   |                           |                                                         |             | C        | -1.6235  | 0.8237   | 1.2068 |
|                                                                                   |                           |                                                         |             | C        | -1.5691  | 1.0342   | 2.4819 |
|                                                                                   |                           |                                                         |             | C        | -0.8530  | 1.1268   | 3.5666 |
|                                                                                   |                           |                                                         |             | C        | 0.4472   | 0.9827   | 3.5739 |

31

32 **Table S3.** Geometry of Mo<sub>2</sub>C<sub>6</sub>, Nanocluster 2.

| Bond length, Å                        | Bond angle, degree |                                                                                                                        | Atom | X  | Y       | Z       |         |
|---------------------------------------|--------------------|------------------------------------------------------------------------------------------------------------------------|------|----|---------|---------|---------|
| Mo <sup>(1)</sup> -Mo <sup>(2)</sup>  | 2.58               | C <sup>(1)</sup> -Mo <sup>(1)</sup> -C <sup>(111)</sup> ,<br>Mo <sup>(1)</sup> -Mo <sup>(2)</sup> -C <sup>(V1)</sup>   | 90   | Mo | 1.2723  | -0.2657 | -0.1394 |
| Mo <sup>(1)</sup> -C <sup>(1)</sup>   | 1.95               | C <sup>(1)</sup> -Mo <sup>(1)</sup> -C <sup>(111)</sup>                                                                | 96   | C  | 1.4393  | 1.7211  | -0.3956 |
| Mo <sup>(1)</sup> -C <sup>(11)</sup>  | 2.00               | C <sup>(IV)</sup> -Mo <sup>(1)</sup> -Mo <sup>(2)</sup>                                                                | 91   | C  | 0.4965  | -1.0265 | 1.48709 |
| Mo <sup>(1)</sup> -C <sup>(111)</sup> | 2.14               | C <sup>(1)</sup> -Mo <sup>(2)</sup> -Mo <sup>(1)</sup>                                                                 | 49   | C  | -1.9567 | -0.4760 | -0.0885 |
| Mo <sup>(1)</sup> -C <sup>(IV)</sup>  | 1.92               | C <sup>(1)</sup> -Mo <sup>(1)</sup> -Mo <sup>(2)</sup>                                                                 | 46   | Mo | -0.8295 | 0.2640  | 1.2689  |
| Mo <sup>(2)</sup> -C <sup>(1)</sup>   | 1.86               | C <sup>(111)</sup> -Mo <sup>(2)</sup> -Mo <sup>(1)</sup>                                                               | 54   | C  | 0.1933  | -1.0140 | -1.5425 |
| Mo <sup>(2)</sup> -C <sup>(111)</sup> | 2.01               | C <sup>(111)</sup> -Mo <sup>(1)</sup> -Mo <sup>(2)</sup>                                                               | 50   | C  | -0.9478 | -0.8110 | -0.9015 |
| Mo <sup>(2)</sup> -C <sup>(V1)</sup>  | 1.90               | C <sup>(111)</sup> -Mo <sup>(1)</sup> -C <sup>(11)</sup> ,<br>C <sup>(111)</sup> -Mo <sup>(1)</sup> -C <sup>(11)</sup> | 37   | C  | 0.3325  | 1.6083  | 0.3116  |
| C <sup>(11)</sup> -C <sup>(111)</sup> | 1.31               | C <sup>(11)</sup> -Mo <sup>(1)</sup> -C <sup>(1)</sup> ,                                                               | 121  |    |         |         |         |
| C <sup>(IV)</sup> -C <sup>(V)</sup>   | 1.32               | C <sup>(IV)</sup> -Mo <sup>(1)</sup> -C <sup>(2)</sup>                                                                 | 110  |    |         |         |         |
| C <sup>(V)</sup> -C <sup>(V1)</sup>   | 1.34               | C <sup>(IV)</sup> -Mo <sup>(1)</sup> -C <sup>(111)</sup> ,<br>C <sup>(IV)</sup> -Mo <sup>(2)</sup> -C <sup>(11)</sup>  | 104  |    |         |         |         |
|                                       |                    | C <sup>(V1)</sup> -Mo <sup>(2)</sup> -C <sup>(111)</sup> ,<br>C <sup>(IV)</sup> -Mo <sup>(1)</sup> -C <sup>(111)</sup> | 105  |    |         |         |         |
|                                       |                    | Mo <sup>(2)</sup> -Mo <sup>(1)</sup> -C <sup>(11)</sup>                                                                | 86   |    |         |         |         |

33

34 **Table S4.** Geometry of Mo<sub>2</sub>C<sub>6</sub>, Nanocluster 3.

| Bond length, Å                        | Bond angle, degree |                                                         | Atom | X  | Y       | Z       |         |
|---------------------------------------|--------------------|---------------------------------------------------------|------|----|---------|---------|---------|
| Mo <sup>(1)</sup> -Mo <sup>(2)</sup>  | 2.37               | C <sup>(1)</sup> -Mo <sup>(1)</sup> -C <sup>(1)</sup>   | 92   | Mo | -0.7815 | -0.7815 | 0.1086  |
| Mo <sup>(1)</sup> -C <sup>(1)</sup>   | 1.90               | C <sup>(11)</sup> -Mo <sup>(1)</sup> -C <sup>(1)</sup>  | 120  | Mo | 0.8679  | -1.3208 | 1.3181  |
| Mo <sup>(1)</sup> -C <sup>(11)</sup>  | 2.10               | Mo <sup>(1)</sup> -Mo <sup>(2)</sup> -C <sup>(1)</sup>  | 52   | C  | -0.8813 | 1.8560  | 0.8366  |
| C <sup>(11)</sup> -C <sup>(111)</sup> | 1.27               | Mo <sup>(1)</sup> -Mo <sup>(2)</sup> -C <sup>(11)</sup> | 110  | C  | 1.7396  | -0.0507 | 2.7587  |
| C <sup>(111)</sup> -C <sup>(IV)</sup> | 1.35               |                                                         |      | C  | 0.0337  | 1.5653  | 1.6655  |
|                                       |                    |                                                         |      | C  | 0.9766  | 0.8794  | 2.3569  |
|                                       |                    |                                                         |      | C  | -1.0141 | -1.5815 | 1.3015  |
|                                       |                    |                                                         |      | C  | 1.3015  | -0.8175 | -0.5141 |

35

36

37

38

39

40 **Table S5.** Geometry of Mo<sub>2</sub>C<sub>6</sub>, Nanocluster 4.

| <b>Bond length, Å</b>                  |      | <b>Bond angle, degree</b>                                  |     | <b>Atom</b> | <b>X</b> | <b>Y</b> | <b>Z</b> |
|----------------------------------------|------|------------------------------------------------------------|-----|-------------|----------|----------|----------|
| Mo <sup>(1)</sup> -Mo <sup>(2)</sup>   | 2.68 | C <sup>(1)</sup> -Mo <sup>(1)</sup> -Mo <sup>(2)</sup>     | 119 | Mo          | 1.5689   | -1.4269  | 0.8050   |
| Mo <sup>(1)</sup> -C <sup>(1)</sup>    | 1.97 | C <sup>(1)</sup> -Mo <sup>(1)</sup> -C <sup>(111')</sup>   | 120 | Mo          | -0.8851  | -1.1393  | -0.2518  |
| Mo <sup>(1)</sup> -C <sup>(11)</sup>   | 2.05 | C <sup>(1)</sup> -Mo <sup>(1)</sup> -C <sup>(11)</sup>     | 39  | C           | -2.3817  | -0.6356  | 0.9382   |
| Mo <sup>(1)</sup> -C <sup>(111)</sup>  | 2.01 | C <sup>(1)</sup> -Mo <sup>(1)</sup> -C <sup>(111)</sup>    | 78  | C           | -0.2424  | -1.8352  | 1.5238   |
| Mo <sup>(1)</sup> -C <sup>(111')</sup> | 2.0  | C <sup>(11)</sup> -Mo <sup>(1)</sup> -C <sup>(111)</sup>   | 40  | C           | 1.6544   | 0.5949   | 0.5155   |
| C <sup>(1)</sup> -C <sup>(11)</sup>    | 1.34 | C <sup>(11)</sup> -Mo <sup>(1)</sup> -C <sup>(111')</sup>  | 107 | C           | -1.4647  | -1.2483  | 1.7056   |
| C <sup>(11)</sup> -C <sup>(111)</sup>  | 1.37 | C <sup>(11)</sup> -Mo <sup>(1)</sup> -Mo <sup>(2)</sup>    | 83  | C           | 0.7322   | 0.0201   | -0.3155  |
|                                        |      | C <sup>(111)</sup> -Mo <sup>(1)</sup> -C <sup>(111')</sup> | 88  | C           | 2.5203   | 0.1798   | 1.4551   |
|                                        |      | C <sup>(111)</sup> -Mo <sup>(1)</sup> -Mo <sup>(2)</sup>   | 48  |             |          |          |          |

41

42 **Table S6.** Geometry of Mo<sub>2</sub>C<sub>6</sub>, Nanocluster 5.

| <b>Bond length, Å</b>                 |      | <b>Bond angle, degree</b>                                |     | <b>Atom</b> | <b>X</b> | <b>Y</b> | <b>Z</b> |
|---------------------------------------|------|----------------------------------------------------------|-----|-------------|----------|----------|----------|
| Mo <sup>(1)</sup> -Mo <sup>(11)</sup> | 2.24 | C <sup>(1)</sup> -Mo <sup>(1)</sup> -C <sup>(11)</sup>   | 37  | Mo          | -0.5856  | 1.1176   | -0.9092  |
| Mo <sup>(1)</sup> -C <sup>(1)</sup>   | 2.08 | C <sup>(1)</sup> -Mo <sup>(1)</sup> -C <sup>(111)</sup>  | 133 | C           | 1.3777   | 1.4868   | -1.2440  |
| Mo <sup>(1)</sup> -C <sup>(11)</sup>  | 2.04 | C <sup>(1)</sup> -Mo <sup>(1)</sup> -C <sup>(1V)</sup>   | 114 | C           | 1.4229   | -0.1130  | 0.8581   |
| Mo <sup>(1)</sup> -C <sup>(111)</sup> | 2.10 | C <sup>(1)</sup> -Mo <sup>(1)</sup> -Mo <sup>(2)</sup>   | 57  | C           | -2.1169  | -1.4947  | -0.1321  |
| Mo <sup>(1)</sup> -C <sup>(1V)</sup>  | 2.25 | C <sup>(1)</sup> -Mo <sup>(2)</sup> -Mo <sup>(1)</sup>   | 58  | Mo          | -0.8441  | -0.2389  | 0.8573   |
| Mo <sup>(2)</sup> -C <sup>(1)</sup>   | 2.06 | C <sup>(11)</sup> -Mo <sup>(1)</sup> -C <sup>(111)</sup> | 123 | C           | -1.6955  | -0.6188  | -1.0131  |
| Mo <sup>(2)</sup> -C <sup>(V)</sup>   | 2.23 | C <sup>(11)</sup> -Mo <sup>(1)</sup> -C <sup>(1V)</sup>  | 130 | C           | 1.5042   | 0.7215   | -0.2036  |
| Mo <sup>(2)</sup> -C <sup>(V1)</sup>  | 2.02 | C <sup>(11)</sup> -Mo <sup>(1)</sup> -Mo <sup>(2)</sup>  | 94  | C           | 0.9372   | -0.8604  | 1.7867   |
| C <sup>(1)</sup> -C <sup>(11)</sup>   | 1.31 | C <sup>(111)</sup> -Mo <sup>(1)</sup> -C <sup>(1V)</sup> | 34  |             |          |          |          |
| C <sup>(111)</sup> -C <sup>(1V)</sup> | 1.29 | C <sup>(111)</sup> -Mo <sup>(1)</sup> -Mo <sup>(2)</sup> | 116 |             |          |          |          |
| C <sup>(1V)</sup> -C <sup>(V)</sup>   | 1.35 | C <sup>(1V)</sup> -Mo <sup>(1)</sup> -Mo <sup>(2)</sup>  | 82  |             |          |          |          |
| C <sup>(V)</sup> -C <sup>(V1)</sup>   | 1.30 | C <sup>(V)</sup> -Mo <sup>(2)</sup> -Mo <sup>(1)</sup>   | 75  |             |          |          |          |
|                                       |      | C <sup>(V)</sup> -Mo <sup>(2)</sup> -C <sup>(1)</sup>    | 111 |             |          |          |          |
|                                       |      | C <sup>(V)</sup> -Mo <sup>(2)</sup> -C <sup>(V1)</sup>   | 35  |             |          |          |          |
|                                       |      | C <sup>(V1)</sup> -Mo <sup>(2)</sup> -Mo <sup>(1)</sup>  | 110 |             |          |          |          |
|                                       |      | C <sup>(V1)</sup> -Mo <sup>(2)</sup> -C <sup>(1)</sup>   | 131 |             |          |          |          |

43

44

45

46

47 **Table S7.** Comparison of activation energy of methane C-H bond activation over different  
48  $\text{Mo}_2\text{C}_6$  nanocluster.

| <b>Cluster</b>       | <b>Activation energy, kJ/mol</b> |
|----------------------|----------------------------------|
| Nanocluster <b>1</b> | 127.4                            |
| Nanocluster <b>2</b> | 67.7                             |
| Nanocluster <b>3</b> | 94.6                             |
| Nanocluster <b>4</b> | 125                              |
| Nanocluster <b>5</b> | 90.7                             |

49

50 **Table S8.** Comparison of activation energies calculated for methane dehydrogenation over  
51 different sites on the metastable  $\text{Mo}_2\text{C}_6$  nanocluster **2**.

| <b>Activation site</b>             | <b>Activation energy, kJ/mol</b> |
|------------------------------------|----------------------------------|
| $\text{Mo}^{(1)}\text{-C}^{(1)}$   | 67.7                             |
| $\text{Mo}^{(1)}\text{-C}^{(11)}$  | 92.3                             |
| $\text{Mo}^{(2)}\text{-C}^{(1)}$   | 120.1                            |
| $\text{Mo}^{(2)}\text{-C}^{(111)}$ | 144.1                            |

52

53

54

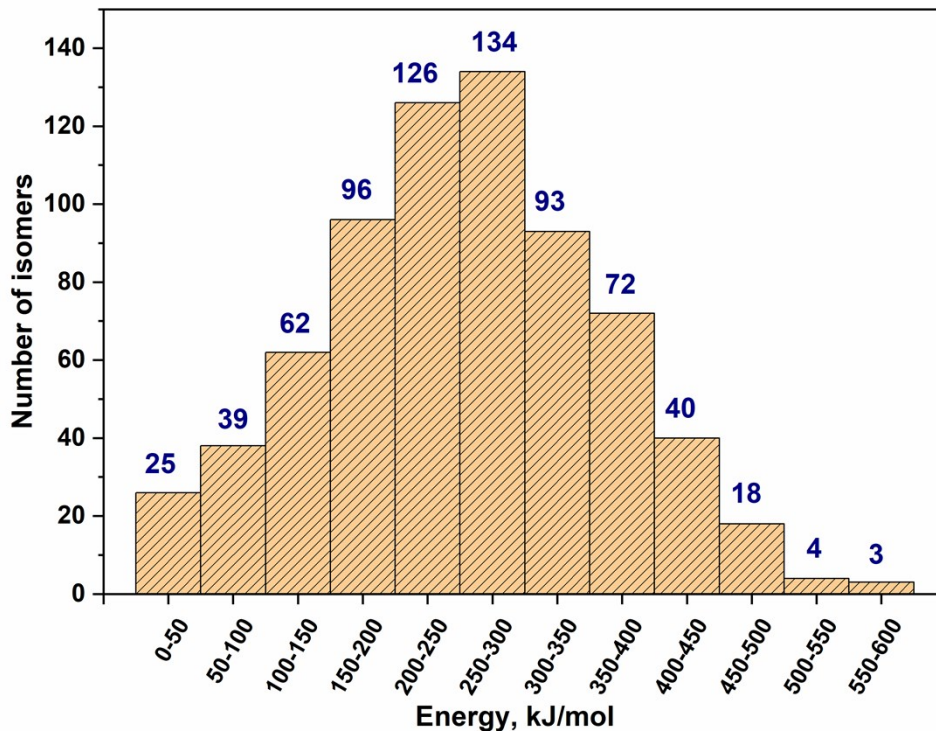

55

56 **Figure S1.** Histogram showing the number of  $\text{Mo}_2\text{C}_6$  structures scanned in the cGA search in  
 57 the energy span of 600 kJ/mol starting with the lowest energy structure used as reference.

58

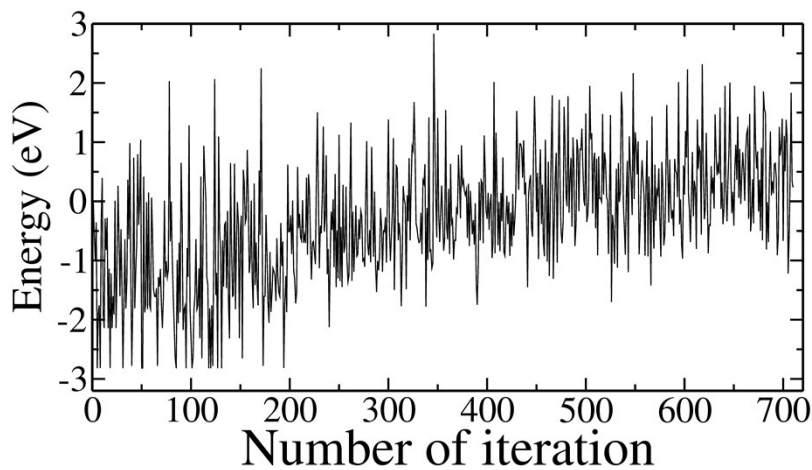

59

60 **Figure S2.** Variations in the energy of the nanoclusters in iterative search on the potential energy  
 61 surface in cGA.

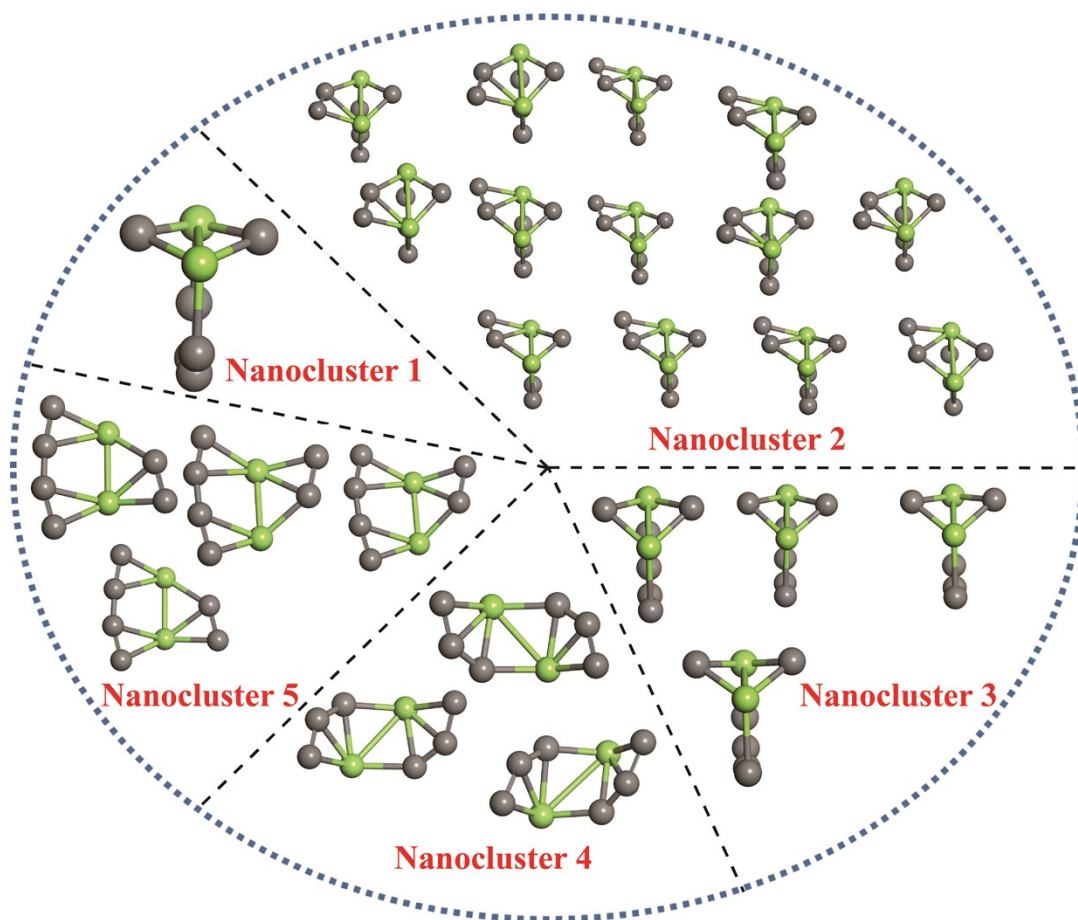

62

63 **Figure S3.** Isomers of structures of  $\text{Mo}_2\text{C}_6$  nanoclusters obtained from the cGA search in energy  
64 span window of 50 kJ/mol with respect to the reference lowest energy nanocluster.

66

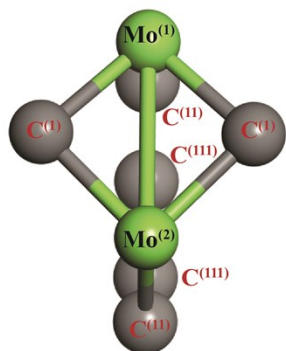

Nanocluster 1

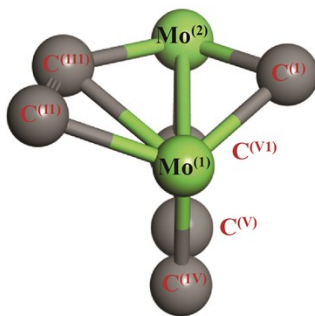

Nanocluster 2

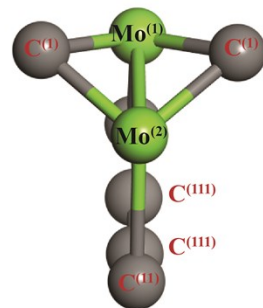

Nanocluster 3

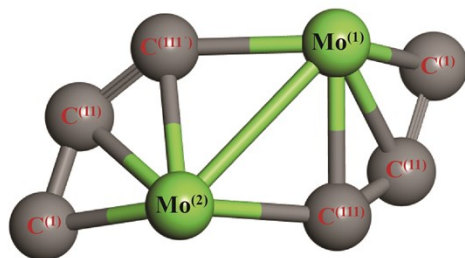

Nanocluster 4

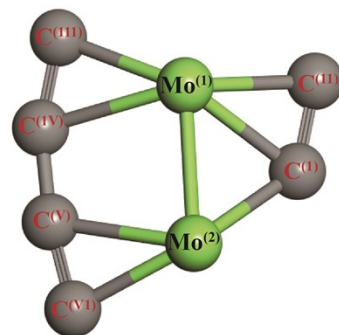

Nanocluster 5

67

68

69 **Figure S4.** Structure of  $\text{Mo}_2\text{C}_6$  nanocluster with atom numbering labels for geometries in Table  
70 S2-6.

71



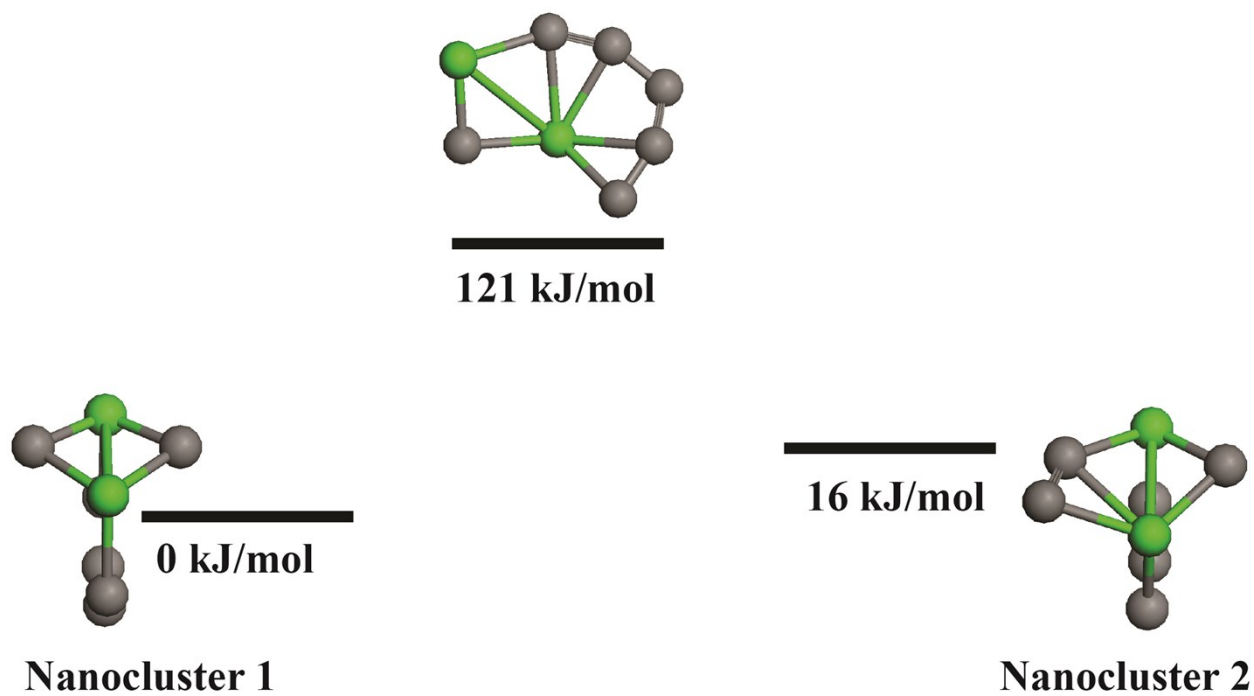

72

73 **Figure S5.** Energy diagram showing the fluxionality between the lowest energy (nanocluster 1)  
 74 and metastable (nanocluster 2) forms of  $\text{Mo}_2\text{C}_6$  via an intermediate structure.

75

76

77

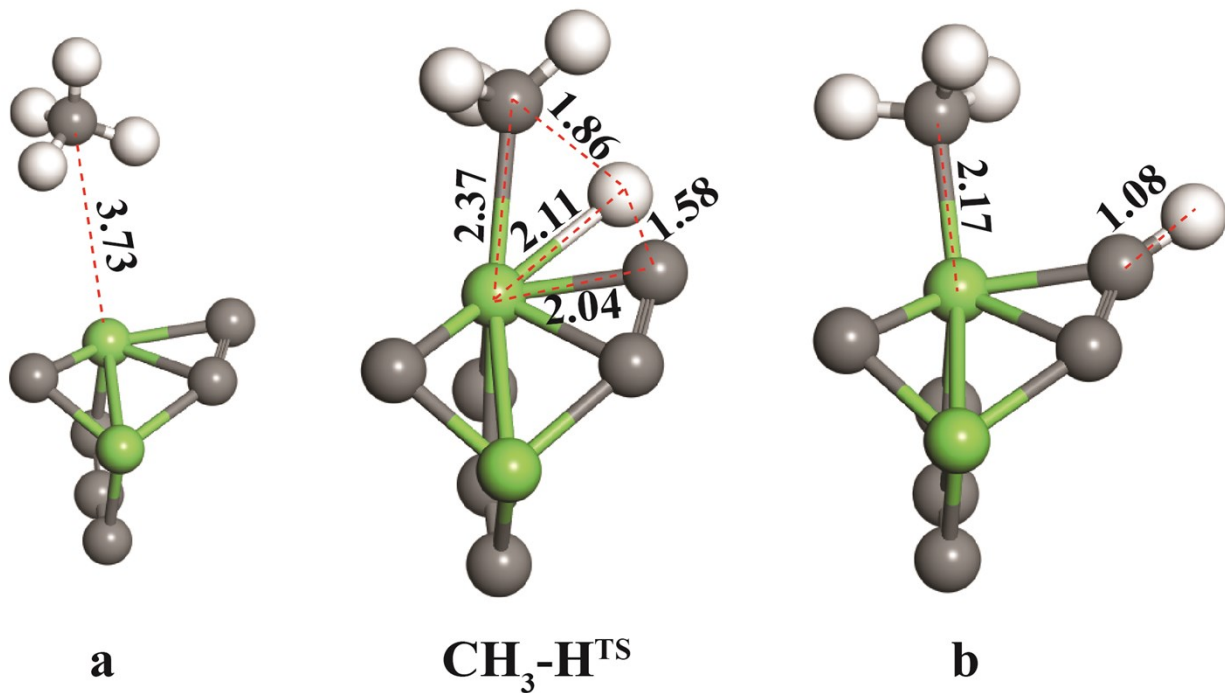

78

79 **Figure S6.** Reactant, transition and product state structures for methane dehydrogenation over  
 80 the Mo<sup>(1)</sup>-C<sup>(11)</sup> site of nanocluster **2** (bond lengths in angstrom).

81

82

83

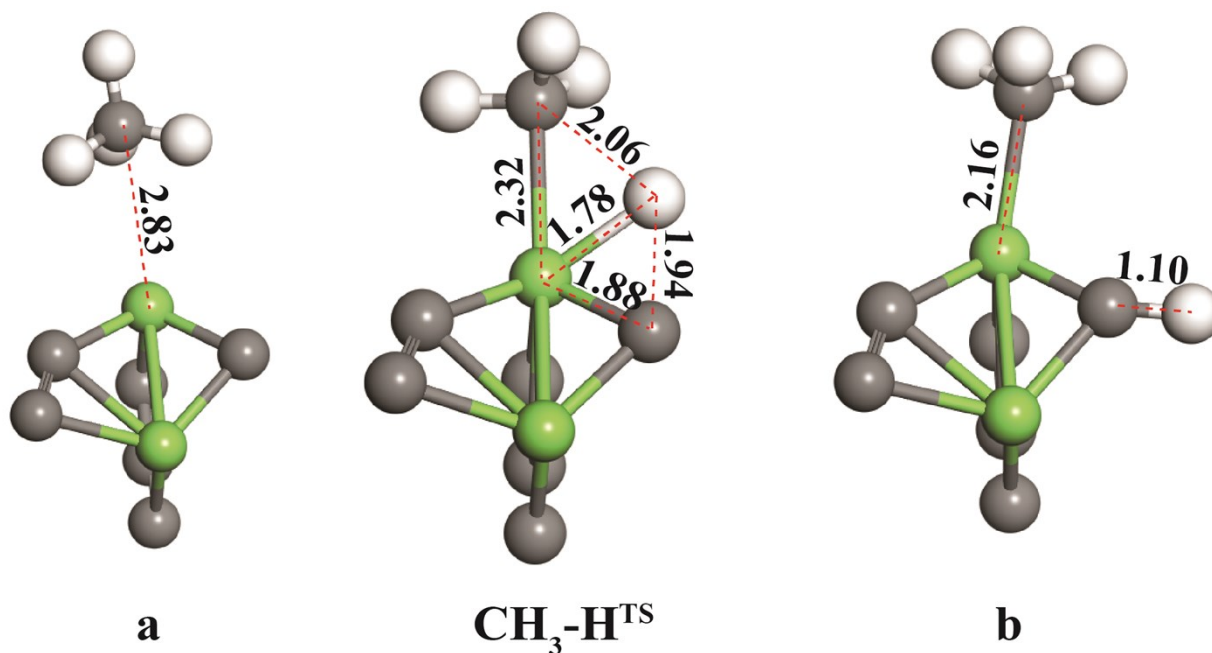

84

85 **Figure S7.** Reactant, transition and product state structures for methane dehydrogenation over  
 86 the Mo<sup>(2)</sup>-C<sup>(1)</sup> site of nanocluster **2** (bond lengths in angstrom).

87

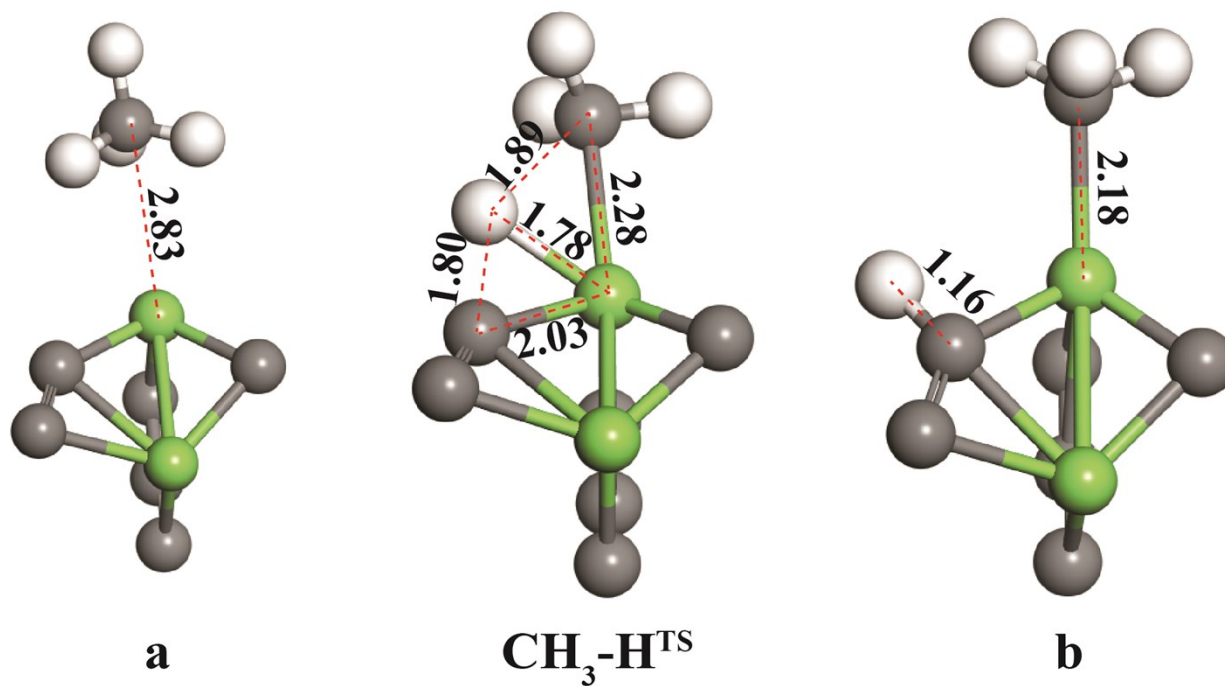

88

89 **Figure S8.** Reactant, transition and product state structures for methane dehydrogenation over  
 90 the Mo<sup>(2)</sup>-C<sup>(111)</sup> site of nanocluster **2** (bond lengths in angstrom).

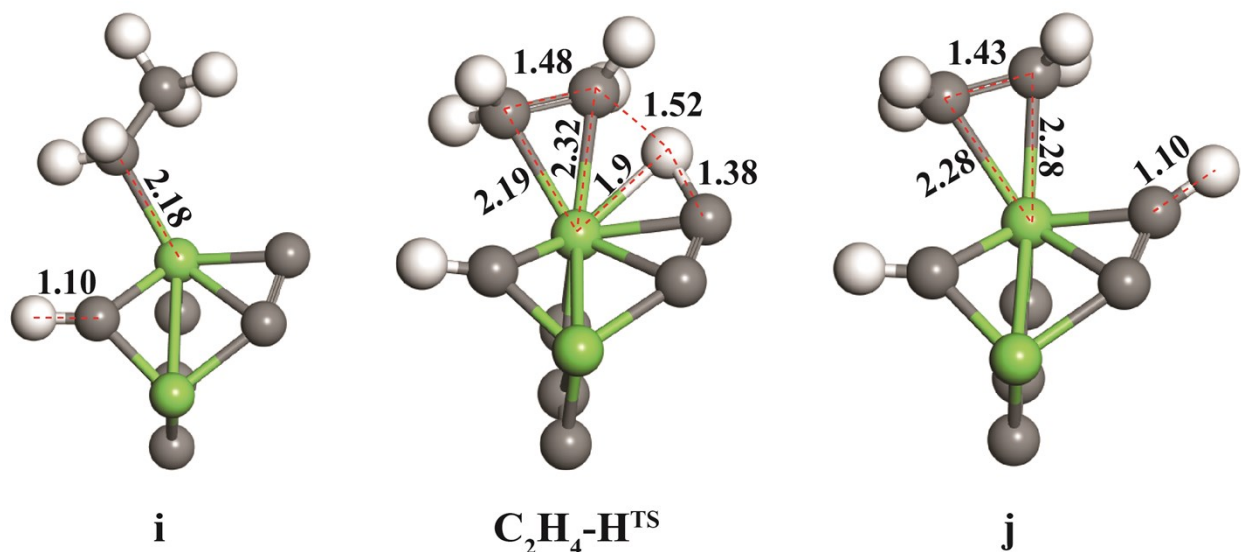

91

92 **Figure S9.** Geometry of reactant, transition and product state structures for C<sub>2</sub>H<sub>5</sub>\*  
 93 dehydrogenation over the Mo<sup>(1)</sup>-C<sup>(11)</sup> site of nanocluster **2** (bond lengths in angstrom).

94

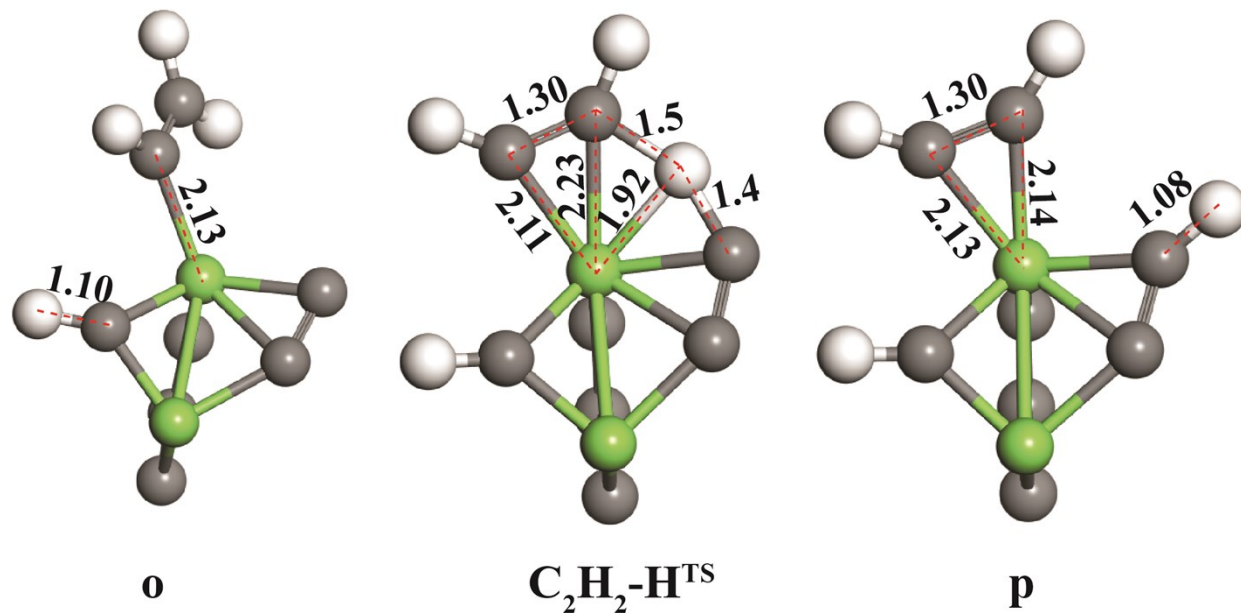

95

96 **Figure S10.** Geometry of reactant, transition and product state structures for C<sub>2</sub>H<sub>3</sub>\*  
 97 dehydrogenation over the Mo<sup>(1)</sup>-C<sup>(11)</sup> site of nanocluster **2** (bond lengths in angstrom).

98

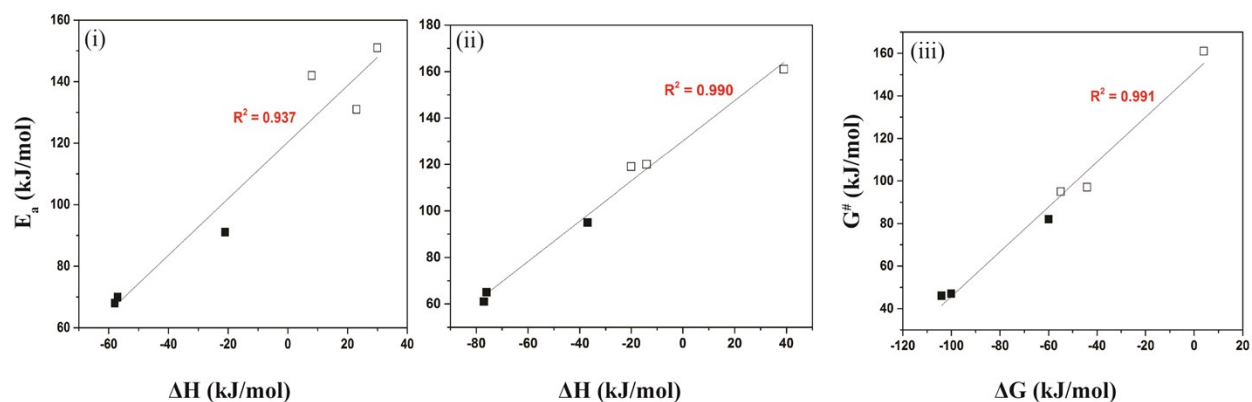

99

100 **Figure S11.** BEP relationships plotted for C-H activation in methane, ethane and ethylene over  
 101 the lowest energy nanocluster **1** (open symbols) and metastable nanocluster **2** (filled symbol)  
 102 using the (i) RPBE functional with fixed nanocluster coordinate, (ii) RPBE functional with  
 103 relaxed nanocluster coordinate and (iii) B3LYP functional with relaxed nanocluster coordinate.

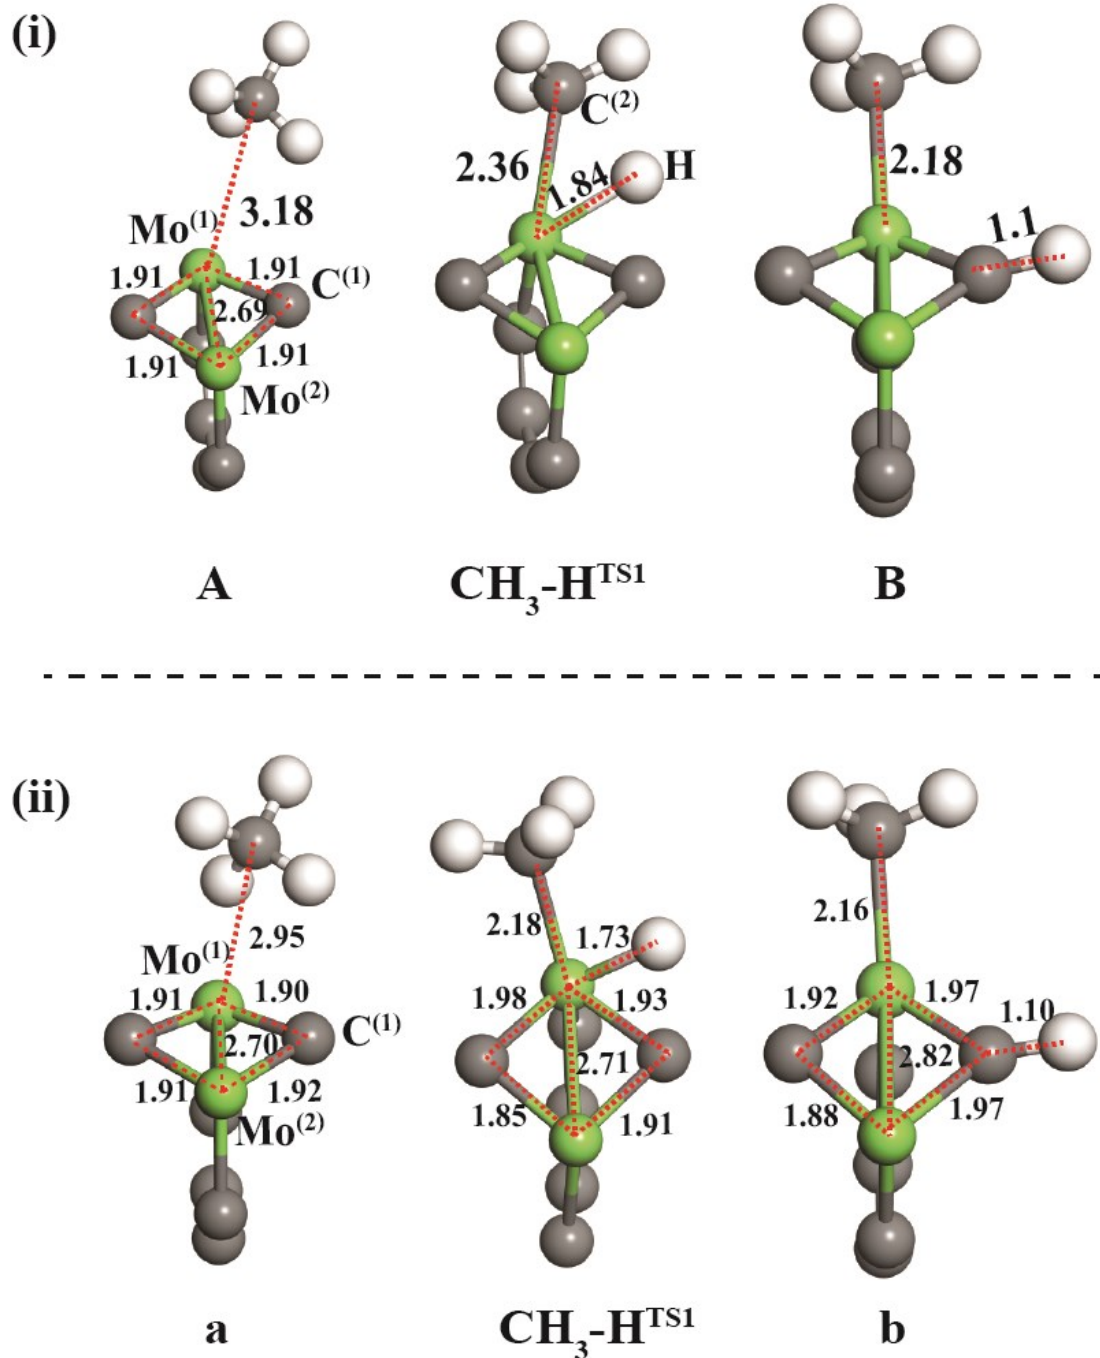

104

105 **Figure S12.** Reactant, transition and product state structures for methane dehydrogenation  
 106 reaction over the Mo<sup>(1)</sup>-C<sup>(1)</sup> site of lowest energy nanocluster **1** for (i) constrained and (ii)  
 107 unconstrained structure (bond lengths are shown in angstrom).

108
